# Supplementary material
Source: MDPI journal article supplement (https://www.mdpi.com/2073-4441/15/16/2977)
Supplement: s1 [file s1]

# Insights into the Responses of the Partial Denitrification Process to Elevated Perfluorooctanoic Acid Stress: Performance, EPS Characteristic and Microbial Community

Shaoqing Zhang <sup>1,†</sup>, Hang Zhang <sup>2,†</sup>, Yucheng Feng <sup>2</sup>, Naga Raju Maddela <sup>3</sup>, Shugeng Li <sup>4,5</sup> and Liqiu Zhang <sup>2,4,\*</sup>

<sup>1</sup> School of Chemistry and Civil Engineering, Shaoguan University, Shaoguan 512005, China; zsqli617@163.com

<sup>2</sup> School of Civil Engineering, Guangzhou University, Guangzhou 510006, China; h15122376276@163.com (H.Z.); 13536202075@163.com (Y.F.)

<sup>3</sup> Departamento de Ciencias Biológicas, Facultad de Ciencias de la Salud, Universidad Técnica de Manabí, Portoviejo 130105, Ecuador; raju.maddela@utm.edu.ec

<sup>4</sup> Key Laboratory for Water Quality and Conservation of the Pearl River Delta, Ministry of Education, Guangzhou 510006, China; lishugeng@gzhu.edu.cn

<sup>5</sup> School of Environmental Science and Engineering, Guangzhou University, Guangzhou 510006, China

\* Correspondence: zllqiu@gzhu.edu.cn

† These authors contributed equally to this work.

**Table S1. Summary of the reactor performances throughout the whole experimental period**

| Phase                       | Influent concentration (mg/L)   |      | Effluent concentration (mg/L)   |                                 |                | NAR (%)       | NTR (%)       | PFOA removal efficiency (%) |
|-----------------------------|---------------------------------|------|---------------------------------|---------------------------------|----------------|---------------|---------------|-----------------------------|
|                             | NO <sub>3</sub> <sup>-</sup> -N | PFOA | NO <sub>3</sub> <sup>-</sup> -N | NO <sub>2</sub> <sup>-</sup> -N | PFOA           |               |               |                             |
| Phase I<br>(days 0-25)      | 48.83±1.35                      | —    | 5.68±1.30                       | 30.76±1.43                      | —              | 71.28±1.41    | 88.35±2.71    | —                           |
| Phase II<br>(days 26-50)    | 48.93±1.27                      | 0.1  | 5.10±0.99                       | 31.17±0.99                      | 0.03±0.01      | 71.19±2.55    | 89.83±1.92*   | 67.42±3.39                  |
| Phase III<br>(days 51-75)   | 50.00±1.48                      | 0.5  | 3.84±1.00                       | 32.06±0.86                      | 0.24±0.04      | 69.52±3.13*   | 92.33±1.96*** | 51.06±8.36                  |
| Phase IV<br>(days 76-100)   | 49.58±1.46                      | 2    | 5.98±1.55                       | 30.02±1.44                      | 1.12±0.17      | 68.97±3.42**  | 87.89±3.33    | 43.77±8.28                  |
| Phase V<br>(days 101-125)   | 48.71±1.33                      | 5    | 6.23±1.21                       | 28.91±1.28                      | 3.92±0.15      | 68.11±3.11*** | 87.21±2.47    | 21.50±3.02                  |
| Phase VI<br>(days 126-150)  | 49.54±1.45                      | 10   | 5.21±1.11                       | 30.11±1.25                      | 9.34±0.52      | 67.94±2.25*** | 89.49±2.15    | 6.56±5.25                   |
| Phase VII<br>(days 151-175) | 49.20±1.18                      | 20   | 5.20±1.32                       | 30.19±1.44                      | 20.23±1.7<br>5 | 68.66±2.90*** | 89.41±2.80    | —                           |

Note: NAR: nitrite accumulation rate. NTR: nitrate transformation ratio. The data are expressed as mean ± standard deviation (SD). Asterisks indicate the statistical significance as compared with Phase I. The statistical significance was determined by a two-tailed independent sample t-test: \*,  $P \leq 0.05$ ; \*\*,  $P \leq 0.01$ ; \*\*\*,  $P \leq 0.001$ .

**Table S2. The effects of PFOA on nitrogen removal performances**

| No. | PFOA dosage | Effects                                                                                                                    | References |
|-----|-------------|----------------------------------------------------------------------------------------------------------------------------|------------|
| 1   | <0.5        | Severe inhibition on nitrite accumulation; significant increase in nitrate reduction                                       | This study |
|     | 0.5-20      | Severe inhibition on nitrite accumulation; no significant effect on nitrate reduction                                      |            |
| 2   | 1           | Severe inhibition on TN and ammonium removal; nitrate and nitrite reduction were inhibited by 13.1% and 5.8%, respectively | [1]        |
| 3   | < 20        | No significant effect                                                                                                      | [2]        |
|     | > 20        | Severe inhibition on TN and ammonium removal and nitrate and nitrite reduction                                             |            |
| 4   | 5           | No significant effect                                                                                                      | [3]        |
|     | 10          | No significant effect                                                                                                      |            |
|     | 20          | No significant effect                                                                                                      |            |
| 5   | 0.05        | No significant effect                                                                                                      | [4]        |
|     | 0.5         | Decrease in TN removal efficiency by 8.32%                                                                                 |            |
| 6   | 0.5         | Increase in TN removal efficiency by 24.6%                                                                                 | [5]        |

Table S3. EEM spectrum information of EPS under different PFOA stresses

|      |                          | Spectral peak information (Ex/Em, intensity) |           |          |           |           |           |          |           |         |           |          |           |           |           |
|------|--------------------------|----------------------------------------------|-----------|----------|-----------|-----------|-----------|----------|-----------|---------|-----------|----------|-----------|-----------|-----------|
|      |                          | Phase I                                      |           | Phase II |           | Phase III |           | Phase VI |           | Phase V |           | Phase VI |           | Phase VII |           |
|      |                          | 0 mg/L                                       |           | 0.1 mg/L |           | 0.5 mg/L  |           | 2 mg/L   |           | 5 mg/L  |           | 10 mg/L  |           | 20 mg/L   |           |
| Peak | Related substances       | Ex/Em                                        | Intensity | Ex/Em    | Intensity | Ex/Em     | Intensity | Ex/Em    | Intensity | Ex/Em   | Intensity | Ex/Em    | Intensity | Ex/Em     | Intensity |
| A    | tryptophan protein-like  | 290/347                                      | 35017     | 290/348  | 187433    | 285/345   | 218654    | 285/346  | 175717    | 285/343 | 175700    | 285/343  | 256545    | 285/343   | 204070    |
| B    | humic acid-like aromatic | 370/457                                      | 7729      | 365/456  | 43592     | 360/453   | 49463     | 360/453  | 36301     | 355/450 | 33777     | 355/447  | 36056     | 350/445   | 25219     |
| C    | protein II-like          | 230/331                                      | 7733      | 225/329  | 44596     | 225/330   | 50159     | 225/320  | 31608     | 225/306 | 52287     | 225/306  | 70307     | 225/306   | 155109    |

**Table S4. Relative percentage of a protein secondary structure in the amide I region at different PFOA concentrations**

| Secondary structures                                | Wavenumber<br>(cm <sup>-1</sup> ) | TB-At (%) |          |           |          |         |          |           |
|-----------------------------------------------------|-----------------------------------|-----------|----------|-----------|----------|---------|----------|-----------|
|                                                     |                                   | Phase I   | Phase II | Phase III | Phase IV | Phase V | Phase VI | Phase VII |
| Aggregated strands                                  | 1600-1625                         | 21.42     | 13.16    | 17.48     | 10.58    | 13.69   | 20.88    | 13.17     |
| β-Sheet                                             | 1625-1640                         | 25.65     | 22.29    | 22.61     | 22.08    | 21.39   | 24.65    | 20.90     |
| Random coil                                         | 1640-1650                         | 0.00      | 0.00     | 0.00      | 28.47    | 0.00    | 0.00     | 0.00      |
| α-Helix                                             | 1650-1660                         | 26.05     | 25.42    | 24.67     | 0.00     | 27.22   | 25.10    | 27.05     |
| 3-Turn helix                                        | 1660-1670                         | 16.67     | 23.06    | 20.92     | 22.20    | 22.22   | 18.14    | 23.71     |
| Antiparallel β-<br>structures/Aggregated<br>strands | 1670-1700                         | 10.21     | 16.08    | 14.33     | 16.67    | 15.49   | 11.24    | 15.17     |

**Table S5. Species diversity indices of sludge samples at different PFOA concentrations**

|           | sobs         | ace            | chao           | shannon    | simpson      | coverage  |
|-----------|--------------|----------------|----------------|------------|--------------|-----------|
| Phase I   | 817±26.87    | 990.85±26.16   | 980.74±11.47   | 3.88±0.05  | 0.09±0.00    | 0.99±0.00 |
| Phase II  | 698±7.07*    | 860.44±24.81*  | 853.71±17.61*  | 4.03±0.02  | 0.07±0.00*   | 0.99±0.00 |
| Phase III | 710±0.00*    | 891.88±30.89   | 901.13±57.23   | 4.10±0.01* | 0.05±0.00*** | 0.99±0.00 |
| Phase IV  | 704.5±47.38  | 881.18±41.92   | 882.63±60.27   | 4.07±0.26  | 0.06±0.01    | 0.99±0.00 |
| Phase V   | 669±28.28*   | 820.21±55.60   | 827.63±57.89   | 4.10±0.05  | 0.05±0.00**  | 0.99±0.00 |
| Phase VI  | 598±1.41**   | 710.79±10.78** | 717.05±15.69** | 4.05±0.09  | 0.05±0.01*   | 0.99±0.00 |
| Phase VII | 586.5±27.58* | 713.41±12.97** | 714.66±32.14** | 3.92±0.06  | 0.05±0.00**  | 0.99±0.00 |

Note: The data are expressed as mean ± standard deviation (SD). Asterisks indicate the statistical significance as compared with Phase I. The statistical significance was determined by a two-tailed independent sample t-test: \*,  $P \leq 0.05$ ; \*\*,  $P \leq 0.01$ ; \*\*\*,  $P \leq 0.001$ .

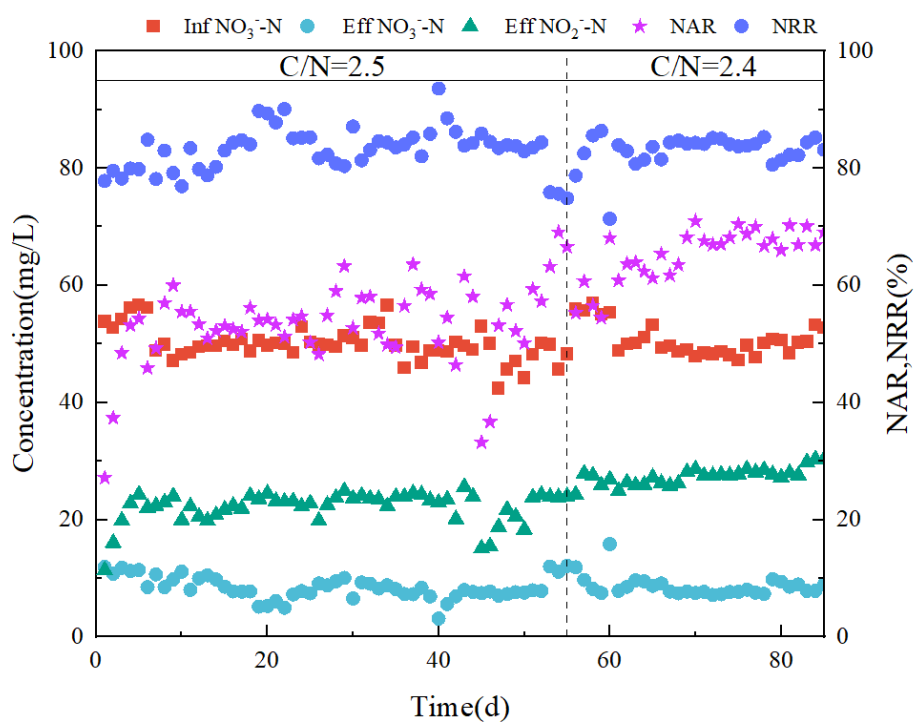

**Figure. S1. Changes in the performance of partial denitrification during PD domestication process.** The corresponding PFOA concentrations of phase I, II, III, IV, V, VI, and VII were 0, 0.1, 0.5, 2, 5, 10, and 20 mg/L, respectively.

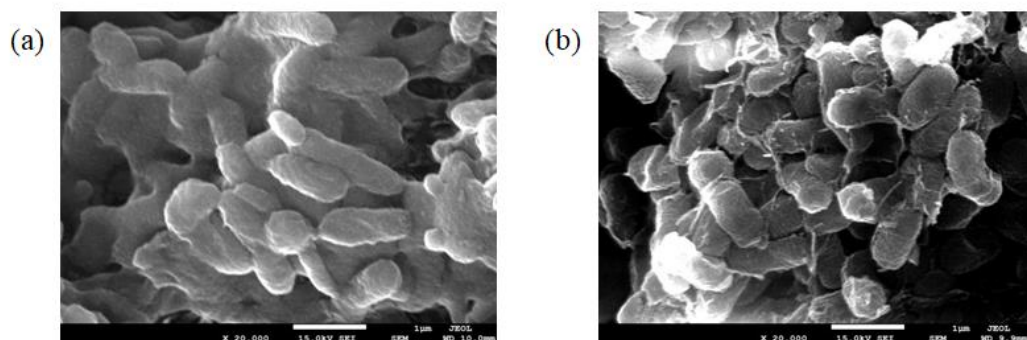

**Figure. S2. SEM image of the sludge before and after PFOA stress:** (a) phase I x 20000; (b) phase VII x 20000.

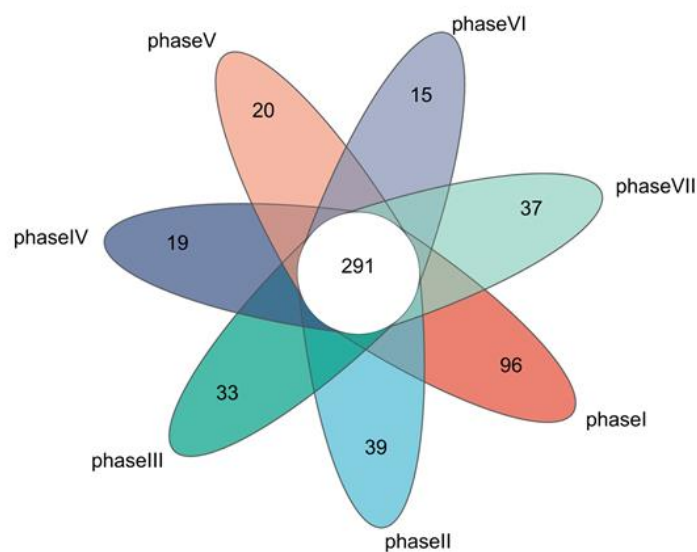

**Figure. S3. Venn diagram showing the unique and shared OTUs in different phases.** The corresponding PFOA concentrations of Phase I, II, III, IV, V, VI, and VII were 0, 0.1, 0.5, 2, 5, 10, and 20 mg/L, respectively.

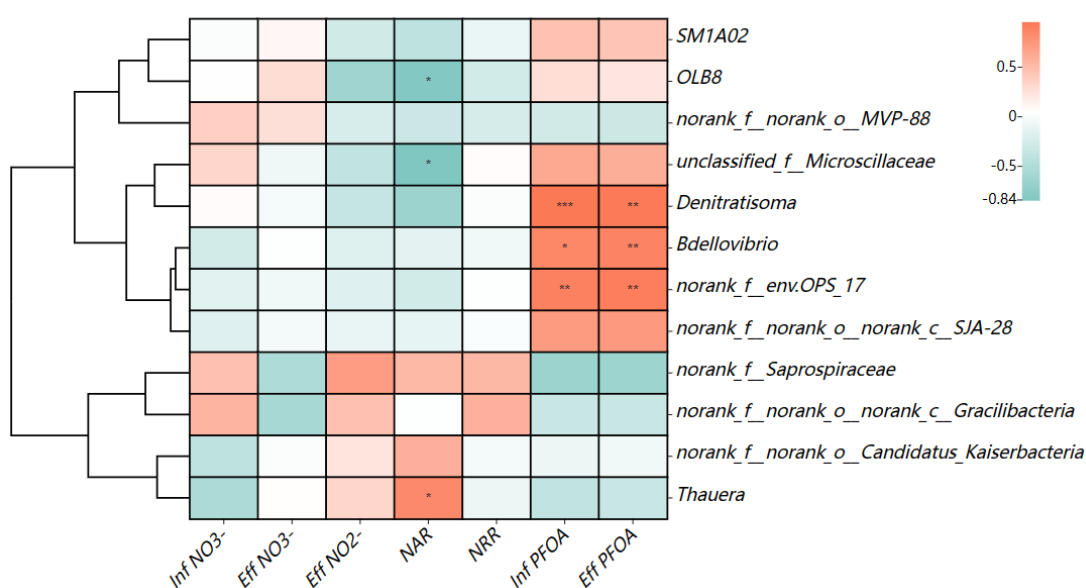

**Figure. S4. Spearman's rank correlations between performance parameters and the major genera.** The corresponding PFOA concentrations of phase I, II, III, IV, V, VI, and VII were 0, 0.1, 0.5, 2, 5, 10, and 20 mg/L, respectively.
